# Supplementary material
Source: PubMed Central journal article supplement (PMC7094028)
Supplement: advancesADV2019001165-suppl1.pdf [file advancesADV2019001165-suppl1.pdf]

Enrollment

Consented (n=78)

Study

Randomized (n=46)

Analysis

Analyzed (n=41)

Excluded (n=32)  
Withdrawn (n=13)  
Screen Failure (n=19)

Discontinued (n=5)  
Lost to follow up (n=2)  
Self withdrawal (n=2)  
PI withdrawal (n=1)
